# Supplementary material
Source: PubMed Central journal article supplement (PMC10546078)
Supplement: dead172_supplementary_figure_s1.pdf [file dead172_supplementary_figure_s1.pdf]

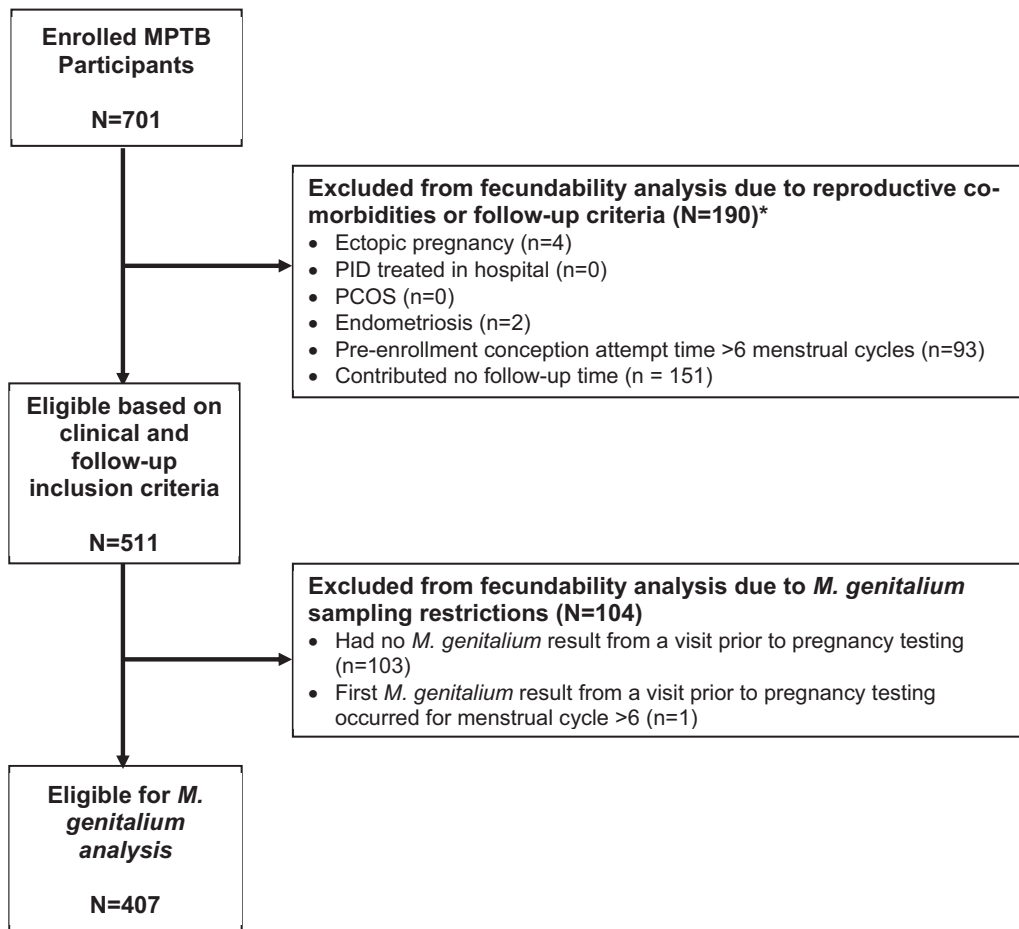

**Supplementary Figure S1.** Microbiota and preterm birth (MPTB) study and *M. genitalium* and fecundability analysis participant eligibility flow chart.  
\*Participants may have been excluded for multiple reasons.
