# Supplementary material
Source: PubMed Central journal article supplement (PMC10546078)
Supplement: dead172_supplementary_table_s2.pdf [file dead172_supplementary_table_s2.pdf]

**Supplementary Table S2.** Unadjusted and adjusted associations between *M. genitalium* at the visit prior and fecundability among 407 Kenyan women trying to conceive—sensitivity analyses.

| Sensitivity analyses for primary exposure:<br><i>M. genitalium</i> at visit prior | Menstrual cycles |           |       | Pregnancies |           |       | Unadjusted  |              | Adjusted model <sup>a</sup> |              |
|-----------------------------------------------------------------------------------|------------------|-----------|-------|-------------|-----------|-------|-------------|--------------|-----------------------------|--------------|
|                                                                                   | N                | n exposed | (%)   | N           | n exposed | (%)   | FR (95% CI) |              | FR (95% CI)                 |              |
| Additionally adjusting for BV at visit prior                                      | 1220             | 98        | (8.0) | 213         | 14        | (6.6) | 0.81        | (0.48, 1.36) | 0.79                        | (0.47, 1.32) |
| Excluding those with <i>C. trachomatis</i> or <i>N. gonorrhoeae</i> at enrollment | 1100             | 87        | (7.9) | 192         | 13        | (6.8) | 0.85        | (0.50, 1.45) | 0.79                        | (0.47, 1.35) |
| Excluding those with potential sub-fecundity <sup>b</sup>                         | 975              | 75        | (7.7) | 175         | 12        | (6.9) | 0.90        | (0.53, 1.54) | 0.81                        | (0.47, 1.40) |
| Excluding reported interim menstrual cycles                                       | 1118             | 87        | (7.8) | 213         | 14        | (6.6) | 0.81        | (0.48, 1.37) | 0.73                        | (0.43, 1.25) |

<sup>a</sup> A priori inclusion of age, study site, and frequency of unprotected sex.

<sup>b</sup> Analysis included 327 participants after excluding 80 women. Exclusions included n = 1 for history of any PID, n = 4 for history of STI, n = 3 for self-report of fibroids or abnormal uterus of unknown etiology, n = 61 for *C. trachomatis*, *N. gonorrhoeae*, or *T. vaginalis* at enrollment, n = 18 for being in an HIV sero-different relationship, n = 0 treated for PID at enrollment, and n = 17 reporting any DMPA use in the 6 months prior to enrollment. Some participants were excluded for multiple reasons.  
 BV, bacterial vaginosis.
